# Supplementary material for: Heligmosomoides polygyrus Venom Allergen-like Protein-4 (HpVAL-4) is a sterol binding protein
Source: PubMed Central journal article supplement (PMC5893428; doi:10.1016/j.ijpara.2018.01.002), 2018-04
Supplement: NIHMS948776-supplement.pdf [file NIHMS948776-supplement.pdf]

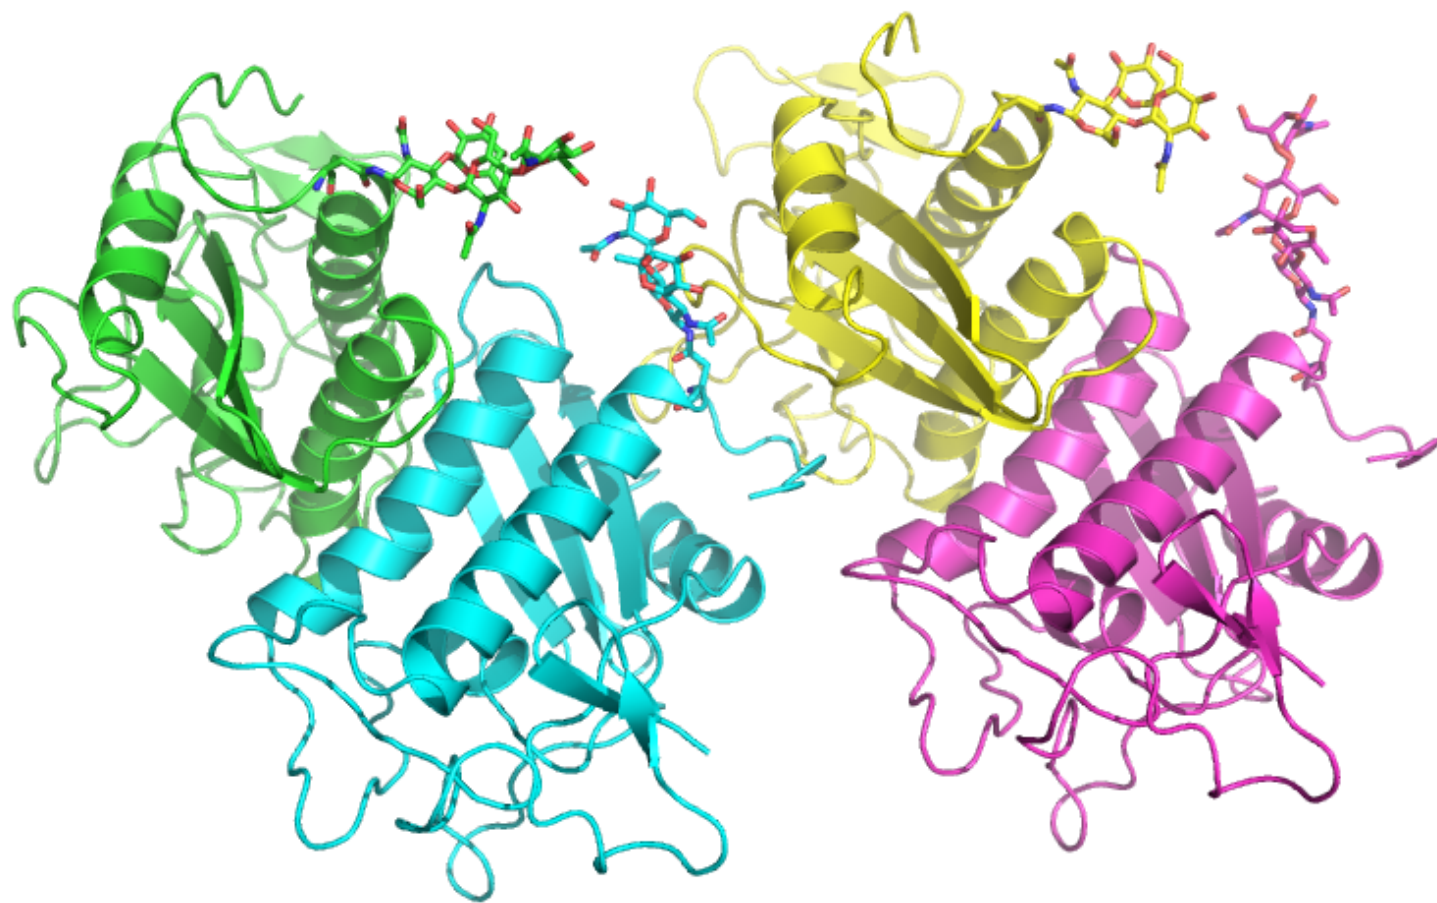

Supplementary Fig. S1.

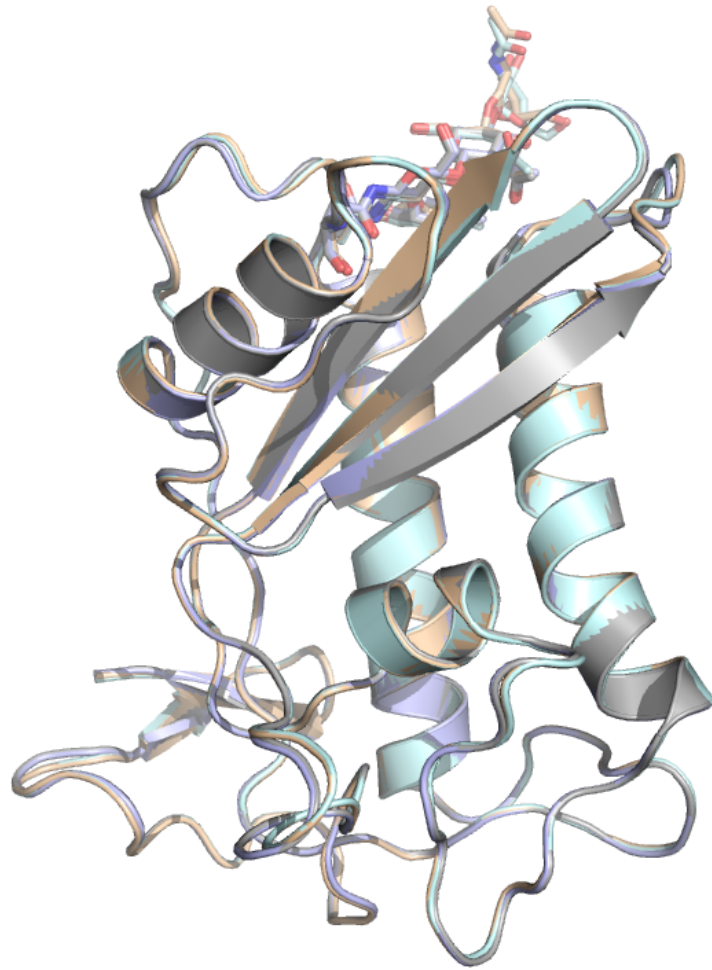

Supplementary Fig. S2.

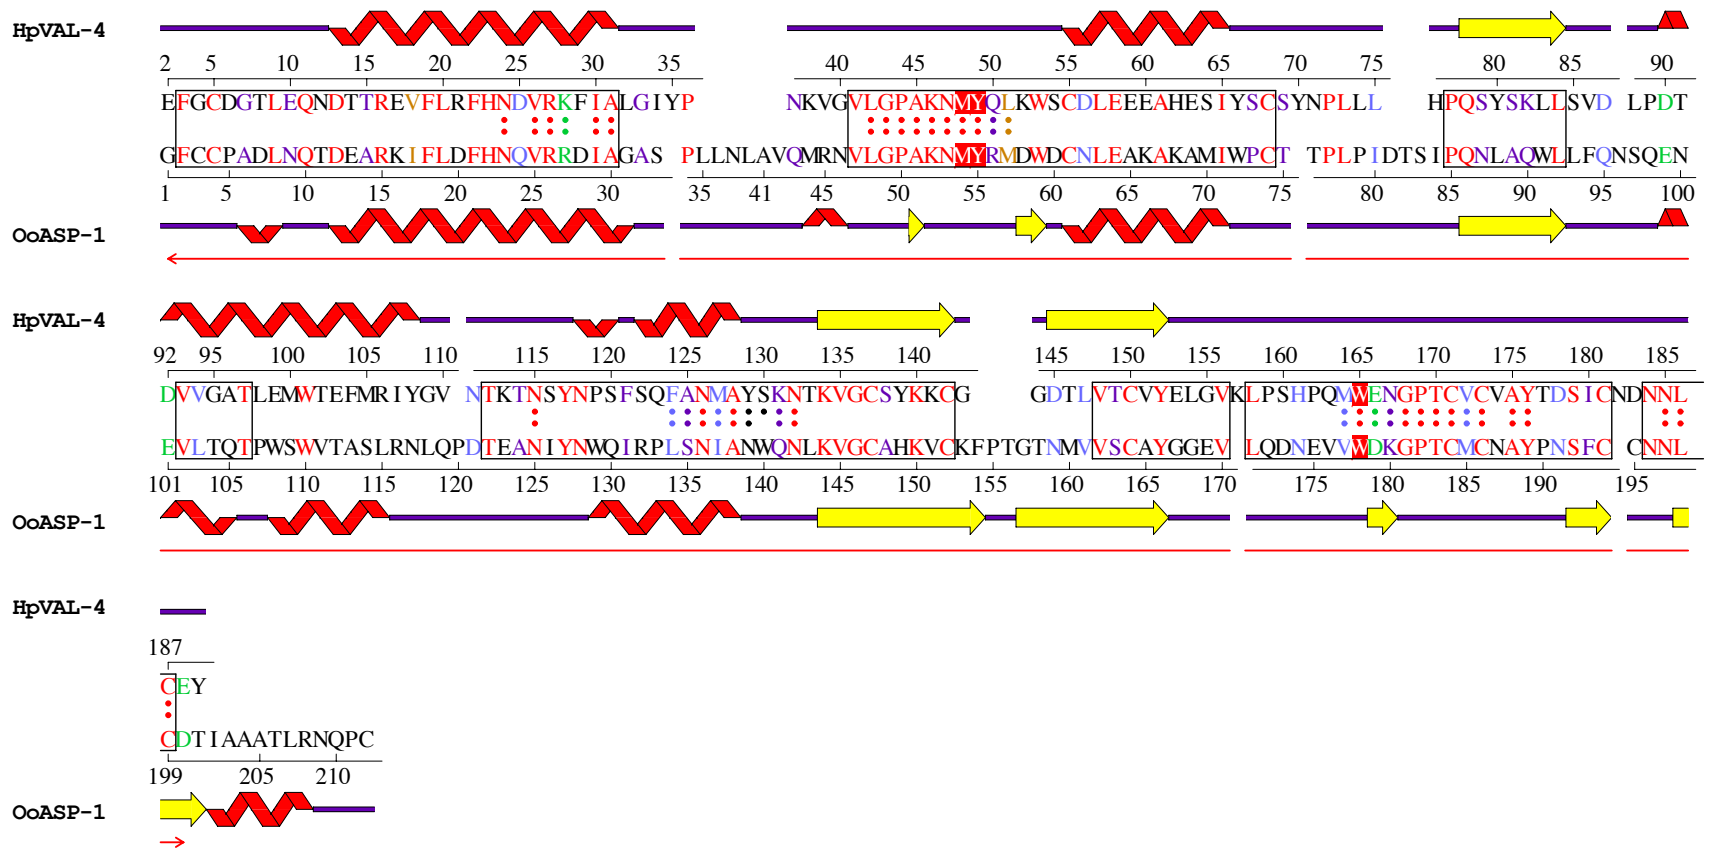

Supplementary Fig. S3.

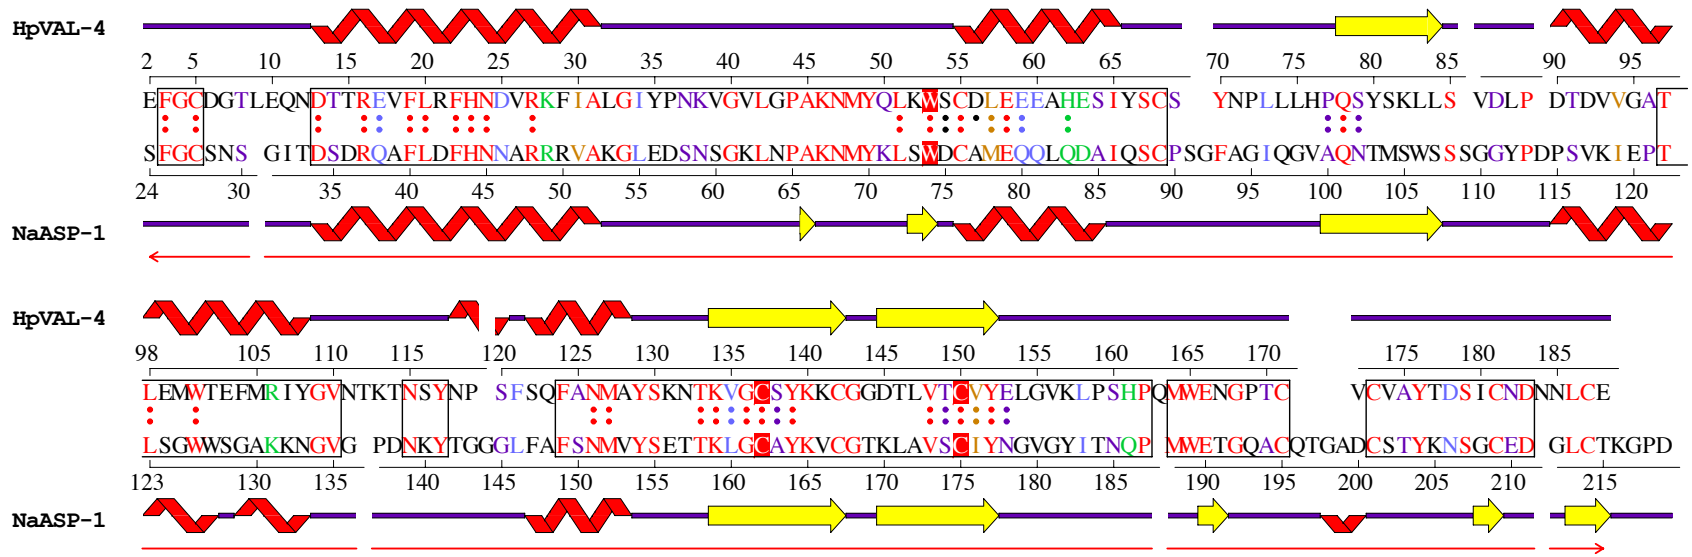

Supplementary Fig. S4.
